# Supplementary material for: The effect of automated text messaging and goal setting on pedometer adherence and physical activity in patients with diabetes: A randomized controlled trial
Source: PLoS One. 2018 May 2;13(5):e0195797. doi: 10.1371/journal.pone.0195797 (PMC5931450; doi:10.1371/journal.pone.0195797)
Supplement: S2 Dataset — (CSV) [file pone.0195797.s002.csv]

link	group	male	height	weight_v1	bmi_v1	sbp_v1	dbp_v1	glucose_v1	insulin_v1	weight_v2	bmi_v2	sbp_v2	dbp_v2	insulin_v3	weight_v3	bmi_v3	sbp_v3	dbp_v3	glucose_v3
0	0	0	163.2	110	41.30022107	125	79	130	23	107.6	40.39912534	129	88	25	104.2	39.12257305	142	80	124
1	0	0	176.5	101.4	32.54981582	136	82	105	36	102	32.74241828	134	71	NA	NA	0	NA	NA	NA
45	0	1	172.5	98.8	33.20310859	150	84	105	26.4	93.3	31.3547574	131	74	7.4	86.9	29.20394875	133	71	98
48	0	0	165.4	123.9	45.28978885	137	69	107	22.8	129	47.15401745	141	77	18.2	115.2	42.10963419	114	68	102
90	0	0	161.3	125.6	48.27484684	93	53	147	60.1	125.4	48.19797607	134	79	45.8	126.7	48.69763611	138	79	167
99	0	0	170.1	102.4	35.39087738	125	74	99	10.8	104.3	36.04754405	126	83	13.8	102.6	35.46000019	118	75	104
132	0	0	158.1	81.8	32.72574664	142	87	111	14.3	80.8	32.32567639	127	86	13.3	83.4	33.36585904	187	76	109
138	0	0	164.9	152.9	56.22975278	150	71	93	12.6	NA	0	NA	NA	NA	NA	0	NA	NA	NA
147	0	1	180.1	120.2	37.05757891	136	76	102	10.6	129	39.77061297	146	93	19.7	134.6	41.49708919	151	92	100
156	0	0	167.8	103.6	36.79390159	122	61	107	18.7	103.5	36.75838624	112	57	NA	NA	0	NA	NA	NA
165	0	1	189	127.8	35.77727387	131	70	193	1.6	NA	0	NA	NA	NA	NA	0	NA	NA	NA
204	0	0	164.8	149.6	55.08294844	131	77	107	26.9	147.1	54.16244462	135	71	35.9	154	56.70303516	155	83	113
219	0	1	176.5	104.1	33.4165269	132	89	107	NA	103.4	33.19182403	135	74	NA	106.5	34.18693674	127	78	110
285	0	0	174.3	127.3	41.90189164	116	69	86	7.8	128.1	42.16521853	126	71	9.5	127.3	41.90189164	127	82	99
327	0	NA	168.4	107.4	37.87216276	127	77	87	19.2	102.3	36.07376397	166	79	NA	NA	0	NA	NA	NA
339	0	1	178.1	113.1	35.6561761	133	83	84	5.6	109.7	34.58428398	124	66	8.3	110	34.6788627	138	77	89
342	0	0	162.4	95.5	36.2102332	131	73	89	11.3	92.3	34.99690602	126	66	7.8	83.6	31.69817273	112	65	91
366	0	0	173.2	82.6	27.53494872	115	77	89	7.4	84	28.00164276	106	71	5.9	84	28.00164276	114	80	92
369	0	0	169.8	147.4	51.12368046	119	77	83	13.7	151.4	52.51102593	130	61	19	152.6	52.92722957	129	77	95
375	0	0	161	77.1	29.74422283	113	85	88	7.4	78.9	30.43864048	117	65	11.9	78.5	30.28432545	108	63	89
381	0	1	186.8	93.2	26.70927924	129	79	105	6.3	89.9	25.76356442	141	81	8.1	93.8	26.88122739	155	84	125
390	0	0	169.2	116.7	40.76337542	131	70	101	42.9	117.3	40.97295575	147	78	36.3	116.6	40.72844536	137	59	107
429	0	0	164.3	78.2	28.96887476	112	73	88	13.1	80.1	29.6727221	122	71	16.1	78.2	28.96887476	126	74	102
435	0	0	167.2	87.7	31.37090497	122	73	90	9.8	85.5	30.58394954	109	69	8.5	84.8	30.33355463	112	72	92
444	0	0	168	102.4	36.28117914	142	70	93	36	101.8	36.0685941	145	69	26.2	103.35	36.61777211	143	71	94
453	0	0	171	90.5	30.94969392	124	66	124	20	90.2	30.84709825	99	56	23.9	92.9	31.77045929	124	62	125
465	0	0	162	93.9	35.77960677	124	69	92	11.7	96	36.57978967	119	59	12.3	97.4	37.11324493	127	69	97
474	0	0	161.2	111.9	43.06257658	136	61	86	8.5	112.7	43.37044129	136	66	8	109.6	42.17746553	122	72	92
492	0	0	166	106.6	38.68485992	156	86	115	19.3	99.5	36.10828858	146	70	NA	NA	0	NA	NA	NA
540	0	1	183.3	142.1	42.29306385	134	79	105	22.8	132.8	39.52511526	116	73	17.5	131.5	39.13819772	126	76	96
567	0	1	175.4	100.6	32.69932612	158	77	97	13.9	99.8	32.43929172	151	78	NA	NA	0	NA	NA	NA
573	0	0	178.7	107.2	33.56956243	133	71	101	15	107	33.50693265	122	65	NA	NA	0	NA	NA	NA
621	0	0	156	80.7	33.16074951	130	78	89	10.1	81	33.28402367	136	67	NA	NA	0	NA	NA	NA
636	0	0	169.4	102.5	35.71881591	140	75	101	11.3	104.9	36.55515891	114	83	8.3	106.9	37.25211142	126	79	103
657	0	1	180.8	120.7	36.92414245	157	89	104	16.6	126.4	38.66786749	141	91	19.1	128.2	39.2185175	126	86	100
660	0	0	169	129.2	45.23651133	148	66	100	19.7	NA	0	NA	NA	NA	NA	0	NA	NA	NA
675	0	1	179.1	140.4	43.76993847	135	72	144	45	137	42.70998269	135	74	21.9	136.5	42.55410685	130	75	106
717	0	0	173.8	121.8	40.32252725	125	75	102	19.3	121.8	40.32252725	138	77	43.6	125	41.38190399	121	78	101
723	0	0	169.6	113.1	39.3197646	123	68	91	18.3	114.9	39.94554334	115	71	27.8	115.4	40.11937077	106	64	93
738	0	0	157.3	79.5	32.1299229	107	69	87	6.5	NA	0	NA	NA	NA	NA	0	NA	NA	NA
789	0	0	173	113.6	37.95649704	153	93	106	8	113.9	38.05673427	133	82	16.4	113.3	37.85625981	124	77	108
876	0	1	189.3	119.3	33.29194862	132	81	NA	21	121.1	33.79425799	135	86	34	123.7	34.51981597	126	86	165
888	0	0	155.5	105.4	43.58929291	139	69	NA	67.6	104.5	43.21708833	151	80	67.4	103.3	42.72081554	126	74	222
939	0	1	187.6	131.4	37.33616414	134	86	116	16.1	135.5	38.50114338	157	83	NA	137	38.9273553	155	88	NA
22	1	1	180.7	101.8	31.1767954	136	88	103	8.3	100.3	30.71741236	149	104	NA	99.7	30.53365915	137	94	NA
49	1	0	169.4	143	49.83210414	123	74	84	34.5	NA	0	NA	NA	NA	NA	0	NA	NA	NA
61	1	0	163.3	104.73	39.27342109	115	64	102	19.2	108.8	40.7996583	109	66	20.4	112.6	42.22464637	126	69	100
88	1	0	174.5	80	26.2723623	137	85	108	20.1	79.7	26.17384094	169	73	17.9	80.7	26.50224547	121	69	127
91	1	0	170.7	89.4	30.68106824	186	80	93	8.2	91.1	31.264489	113	73	14.6	89.4	30.68106824	136	79	98
133	1	0	188.7	127.7	35.8630397	151	92	133	10.9	125.9	35.35753092	130	82	NA	131.1	36.81788962	141	95	NA
148	1	0	179.9	124.1	38.34506293	147	79	105	9.3	127.3	39.33381556	137	79	10.7	129.9	40.13717707	135	80	104
166	1	0	162.4	106.5	40.3810454	128	73	102	12	98.6	37.38564391	126	60	7.6	92.7	35.14857191	119	65	92
190	1	1	171.9	134.4	45.48283378	144	79	98	19.3	131.6	44.53527475	140	79	29.4	129.6	43.85844686	133	87	99
199	1	0	172.3	91.2	30.72021731	110	75	91	12.3	91	30.65284841	121	82	6.1	80.6	27.14966573	102	67	96
235	1	0	162.8	96.2	36.29662721	122	68	98	12.7	NA	0	NA	NA	NA	NA	0	NA	NA	NA
274	1	1	178.5	107.4	33.70760069	125	84	123	18.9	104.7	32.8602029	154	94	16	105	32.95435821	125	81	111
277	1	0	169.8	99.4	34.47553486	119	69	90	13.4	99.8	34.6142694	129	70	18	99.8	34.6142694	115	67	91
283	1	0	176.1	111.3	35.89024743	141	76	90	13.4	112.4	36.24495787	138	69	11.8	108.1	34.85836251	127	72	97
286	1	0	167.1	106.7	38.2130339	131	71	189	15	108	38.67860976	128	62	16.4	104.8	37.53257688	130	69	169
328	1	0	165.6	105.6	38.50731639	133	69	109	30.2	107.4	39.1636911	142	68	31.8	109.2	39.82006581	129	74	103
364	1	0	160.6	108.2	41.95040702	123	70	118	14.4	109.8	42.57074576	112	59	49	114.8	44.50930431	125	70	256
370	1	0	175.2	141	45.93576031	154	85	NA	NA	142.8	46.52217427	140	76	39.9	142.2	46.32670295	136	74	192
379	1	0	162.9	82.6	31.12704394	140	71	137	16.4	84.3	31.76767317	134	65	29.6	83.5	31.46620059	143	69	148
382	1	1	178.7	122.7	38.42337043	159	95	91	12.8	NA	0	NA	NA	NA	NA	0	NA	NA	NA
391	1	0	173.9	95.7	31.64555916	130	68	98	9.6	97.7	32.30690835	127	68	8.8	98.7	32.63758295	128	73	98
430	1	0	158.4	81.1	32.32291348	145	89	121	17.1	83.3	33.19973727	159	93	19.7	83.65	33.33923197	148	83	112
454	1	0	184.1	137.4	40.53957167	159	93	99	36.9	139.7	41.21818167	143	83	44.5	140.3	41.39521037	142	82	92
466	1	1	210.8	169.4	38.12169417	133	71	98	15.4	167.7	37.73912699	134	71	14	165.6	37.26654401	137	78	94
493	1	0	167.7	97.5	34.66877453	125	65	114	23.6	93.5	33.24646583	129	65	9.5	93	33.06867724	114	65	101
508	1	1	173.5	109.2	36.27635808	135	79	93	10.9	104	34.54891246	137	97	6.3	105	34.88111354	138	89	86
541	1	0	168.1	89.7	31.74366127	116	73	102	12.1	NA	0	NA	NA	NA	NA	0	NA	NA	NA
565	1	0	159	72.7	28.75677386	141	95	168	11.7	72.3	28.59855227	160	91	12	71.7	28.36121989	153	88	140
574	1	1	179.8	135.5	41.9140783	134	72	299	32.9	134	41.45008482	143	75	33.1	134.5	41.60474931	143	78	125
658	1	0	160	143.1	55.8984375	148	71	125	15.6	143	55.859375	126	69	NA	NA	0	NA	NA	NA
691	1	0	172	92.7	31.33450514	114	79	96	11.8	92	31.09789075	112	74	10.3	91.1	30.79367226	120	70	92
709	1	0	166	108.4	39.33807519	118	66	81	10.5	112.4	40.78966468	109	65	NA	NA	0	NA	NA	NA
739	1	0	166.7	123.6	44.47820694	131	72	142	47.8	119.9	43.14673958	130	86	25.7	118.8	42.75089793	133	78	153
748	1	0	175.5	93.1	30.22702738	125	80	NA	18.3	93.3	30.29196192	131	78	22.4	92.3	29.96728923	125	76	98
778	1	0	168.3	98.4	34.73976421	146	90	NA	30.4	NA	0	NA	NA	NA	NA	0	NA	NA	NA
781	1	1	181.8	108.3	32.76730313	128	69	NA	94.5	98.9	29.92323435	125	71	31.4	106.2	32.13192606	110	70	104
814	1	0	171.6	105.4	35.79365467	156	91	NA	11.2	105.1	35.6917752	132	83	18.3	104.6	35.52197608	143	93	92
826	1	0	174	104.1	34.38367023	135	92	130	18.2	103.1	34.05337561	148	103	54.2	105.6	34.87911217	155	103	125
877	1	1	178	97.3	30.70950638	121	78	167	19.3	97.7	30.83575306	135	91	18.6	98.5	31.08824643	122	83	128
898	1	0	173.2	119.1	39.7023292	125	69	NA	17.8	117.4	39.13562929	127	69	17.1	NA	0	NA	NA	99
904	1	0	165.1	100.2	36.75983683	163	76	NA	22	NA	0	NA	NA	NA	NA	0	NA	NA	NA
910	1	0	165.8	89.7	32.63047461	125	71	96	17.1	91.1	33.13975738	110	75	22.8	91.8	33.39439876	123	69	94
937	1	1	167.2	107.8	38.56081592	161	71	132	8.6	105.7	37.80963119	145	69	7.2	103.2	36.91536366	146	71	117
23	2	1	178.3	91.5	28.78183027	136	86	144	5.9	90.8	28.5616414	123	83	5.9	88.1	27.71234149	133	82	154
44	2	0	164.1	104.2	38.6946174	132	88	85	10.3	NA	0	NA	NA	NA	NA	0	NA	NA	NA
62	2	0	149.2	69.2	31.08625808	129	77	99	12.9	NA	0	NA	NA	NA	NA	0	NA	NA	NA
89	2	1	182.6	110.2	33.05065328	124	71	91	18.6	110.2	33.05065328	137	79	72.8	107	32.09092469	123	68	128
98	2	0	162.1	88	33.49011528	129	65	101	21.9	88.7	33.75651392	135	60	20.9	89.7	34.13708341	137	78	102
134	2	1	191	138.5	37.96496807	145	85	98	13.1	143.1	39.22589841	148	97	8.8	137	37.55379513	140	79	95
137	2	0	162.4	108.3	41.06354194	146	63	106	31.3	108.4	41.10145842	144	66	43.8	109.1	41.36687374	132	72	114
143	2	0	161.3	140.8	54.11702576	146	83	131	54.1	143.2	55.03947506	108	43	71.6	148.2	56.96124445	134	85	168
146	2	0	161.9	93.8	35.78566902	142	85	113	13.8	89.1	33.99257047	147	91	9.8	90.2	34.41223183	139	82	106
155	2	1	179.8	119.7	37.02668024	147	83	101	10.1	119.9	37.08854604	130	91	9.3	121.7	37.64533823	133	90	98
191	2	1	176.6	110.3	35.36666543	133	86	79	12.2	111.2	35.65524203	131	81	16.8	110.05	35.28650526	128	74	96
203	2	0	168.4	110.8	39.07109529	167	91	83	10.9	113.4	39.98792604	138	68	NA	NA	0	NA	NA	NA
218	2	0	173.8	112.7	37.30992464	140	88	88	22.1	110.5	36.58160313	127	73	33.8	111.4	36.87955284	152	78	94
236	2	0	166.8	133.6	48.01913865	136	76	98	33	133.7	48.05508111	128	70	23.7	131.9	47.40811667	117	72	98
275	2	0	166.7	108.4	39.00839508	143	67	95	11.7	108.4	39.00839508	136	61	NA	NA	0	NA	NA	NA
278	2	0	167.8	99.4	35.30225693	137	74	88	7.5	100.3	35.62189507	139	76	12.7	98.75	35.07140716	129	69	91
284	2	0	163.6	94.8	35.41944393	150	81	103	15.6	96.2	35.94251589	141	75	21	95.3	35.60625534	151	80	104
338	2	0	179.5	107.9	33.48825661	165	89	193	11.8	108	33.51929299	147	89	NA	107.7	33.42618384	141	86	NA
344	2	0	168.8	108.8	38.18422767	119	66	103	11.2	102.6	36.00828822	116	65	12.5	101.1	35.48185126	125	55	107
365	2	0	157	87.9	35.66067589	137	81	100	9	88.9	36.06637186	138	78	27.1	88	35.70124549	122	73	107
374	2	0	172	105.5	35.6611682	123	86	98	37.5	109.8	37.11465657	NA	NA	NA	NA	0	NA	NA	NA
380	2	0	157.3	90.1	36.41391262	137	67	109	15.5	90	36.37349762	145	69	11.1	90.4	36.53515761	146	70	100
383	2	1	179.2	154.5	48.11189613	144	75	113	20.4	NA	0	NA	NA	NA	NA	0	NA	NA	NA
407	2	0	156.8	103.2	41.97469804	146	91	94	10.8	NA	0	NA	NA	NA	NA	0	NA	NA	NA
443	2	0	170.8	124.9	42.81408882	134	75	95	17.2	128.5	44.0481218	122	79	20.2	128.4	44.01384311	147	74	112
473	2	0	169	85.7	30.00595217	139	75	170	10.3	87.5	30.63618221	141	77	13.7	86.4	30.25104163	125	75	145
509	2	0	167	91	32.62935207	127	84	98	25.5	89.9	32.23493133	114	66	NA	NA	0	NA	NA	NA
566	2	0	172.8	95.2	31.88228738	141	79	98	13	93.3	31.24598122	133	78	NA	NA	0	NA	NA	NA
611	2	0	152.9	89.8	38.41150874	147	80	101	10.6	90.3	38.62538128	134	82	8	92.1	39.39532244	186	79	102
620	2	1	182	164.83	49.76150223	128	75	111	21.2	164.6	49.69206618	133	88	25.1	166.4	50.23547881	122	86	111
635	2	0	171	150.7	51.53722513	141	81	98	23.1	151.6	51.84501214	134	75	17.4	156	53.34974864	148	71	93
659	2	1	174.6	78	25.58621966	138	92	115	5	NA	0	NA	NA	NA	NA	0	NA	NA	NA
704	2	0	160	110.7	43.2421875	134	71	93	33.1	113	44.140625	143	67	44.6	115.5	45.1171875	133	73	103
713	2	1	176.5	104.3	33.48072772	129	85	238	18.3	108.3	34.76474412	136	87	14	111.5	35.79195724	135	80	338
785	2	0	153.1	116.4	49.65952932	131	80	94	172	118.2	50.42746018	135	80	90.9	125.4	53.49918365	145	85	157
797	2	0	165.5	114.8	41.91272442	157	107	88	62.2	115	41.9857431	143	94	43.1	113.4	41.40159363	144	93	90
809	2	0	157.8	71.9	28.87452793	120	80	NA	12.9	72.6	29.15564294	145	83	10	70.4	28.27213861	127	65	93
893	2	0	177.7	117.8	37.30529124	126	67	94	NA	NA	0	NA	NA	NA	NA	0	NA	NA	NA
902	2	0	171.3	90.1	30.70506811	124	70	93	7.7	92.6	31.55704003	134	78	6	93.8	31.96598655	125	72	100
908	2	0	173.7	93.8	31.08874577	136	87	94	15.6	92.3	30.59159099	131	76	8.9	92.6	30.69102195	128	77	103
926	2	0	167.4	86.5	30.86776606	121	78	89	10.4	90	32.11675081	117	67	NA	93.9	33.50847668	126	67	NA
